# Supplementary material for: Knockdown NRPC2, 3, 8, NRPABC1 and NRPABC2 Affects RNAPIII Activity and Disrupts Seed Development in Arabidopsis
Source: MDPI journal article supplement (doi:10.3390/ijms222111314), 2021-10-20
Supplement: s1 [file s1]

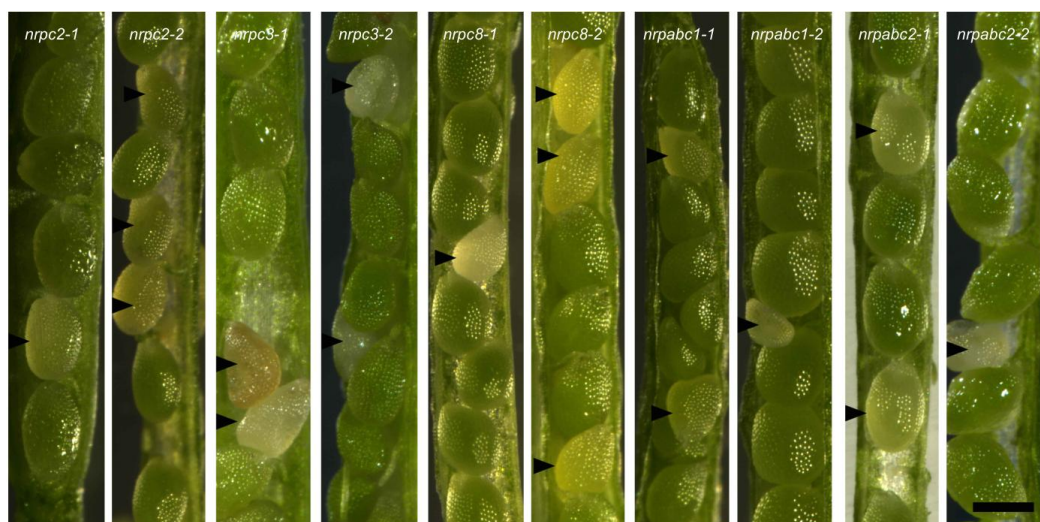

**Supplemental Figure S1.** Phenotypic features of different subunits knockdown seeds at 15DAF (black arrow indicates mutant seeds, Scale bar = 300  $\mu$ m).

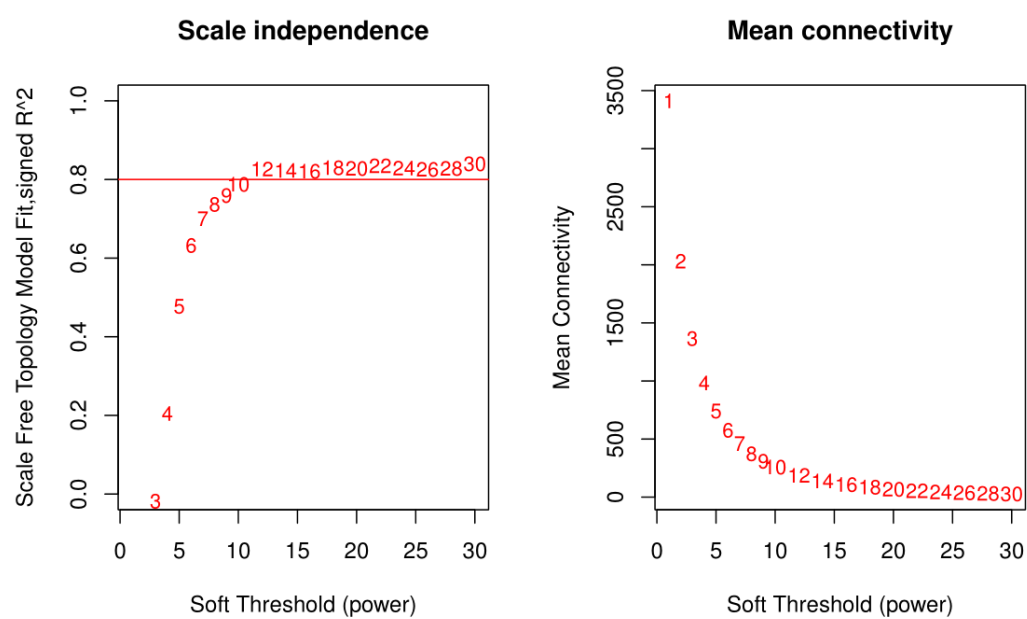

**Supplemental Figure S2.** Soft-thresholding powers test in WGCNA.

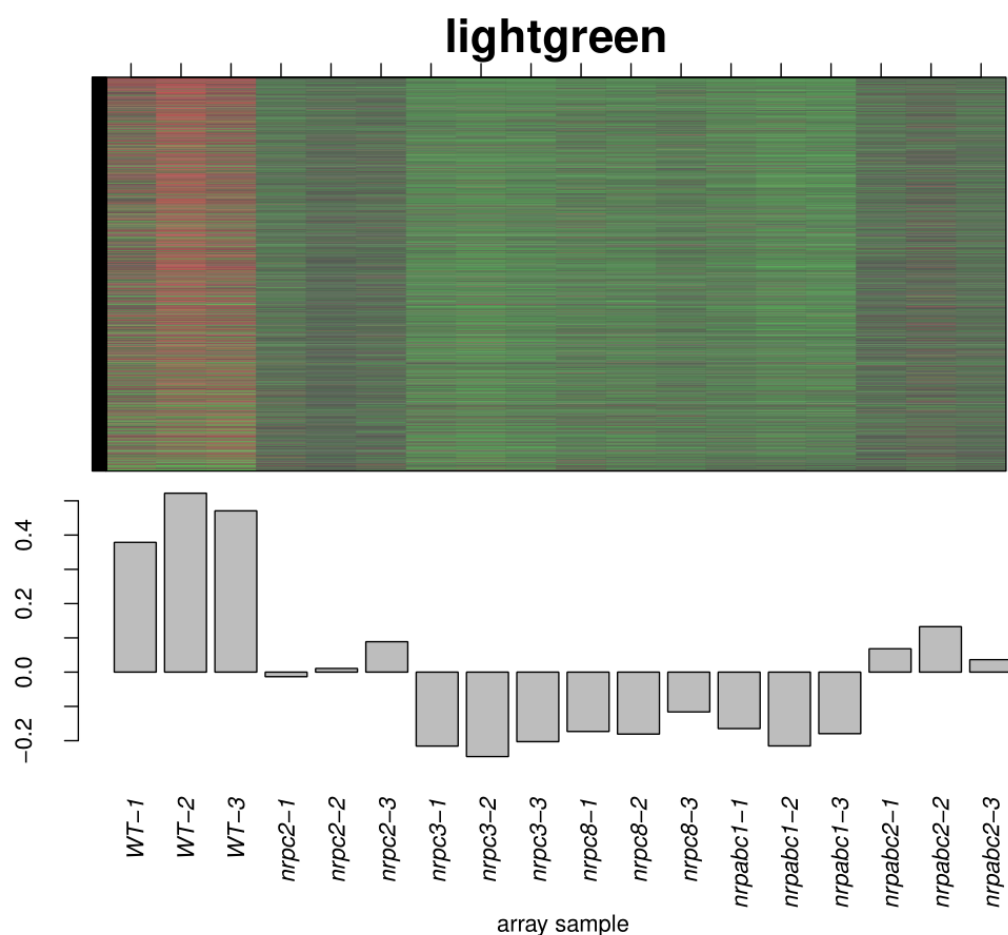

**Supplemental Figure S3.** The co-expressed genes are shown in heatmap and bar graph in the lightgreen module.

**Supplemental Table S1.** The primers used in this study.

|              |                      |         |
|--------------|----------------------|---------|
| qNRPC2-F     | AGCGATGGGACTTGATCAAG | qRT_PCR |
| qNRPC2-R     | TGCTTCACAAGTCCTCTCAC | qRT_PCR |
| qNRPC3-F     | TCTCCATTGAACCTCCTG   | qRT_PCR |
| qNRPC3-R     | CTTGGAGTCAAGTTCTTCG  | qRT_PCR |
| qNRPC8-F     | CTCTCGAAGATGCCATTAAG | qRT_PCR |
| qNRPC8-R     | TATAGGTCGCAGCACCATC  | qRT_PCR |
| qNRPABC1-F   | AGGCGGAAATGCTAGTGAAC | qRT_PCR |
| qNRPABC1-R   | GTCACCTGGATCCTTGGAAG | qRT_PCR |
| qNRPABC2-1-F | GATTACAACGACGTCGATG  | qRT_PCR |
| qNRPABC2-1-R | CAATAGGCTCACCATTGAC  | qRT_PCR |
| qNRPABC2-2-F | TCGACTTTAATGGCTGACG  | qRT_PCR |
| qNRPABC2-2-R | CTGTTTCAAAGGGTCAAC   | qRT_PCR |
| qAT-Arg-F    | CCTGTAGCTCAGTGGATAG  | qRT_PCR |
| qAT-Arg-R    | AGGTAGGGGTCGAACCTAC  | qRT_PCR |
| qAT-Ala-F    | GGATGTAGCTCAGATGGTAG | qRT_PCR |
| qAT-Ala-R    | GAGATGCGGGGTATCGATC  | qRT_PCR |
| qAT-Asn-F    | GCTGGAATAGCTCAGTTGG  | qRT_PCR |

|               |                                                  |         |
|---------------|--------------------------------------------------|---------|
| qAT-Asn-R     | CTAGAAGGAGGGGTCGAAC                              | qRT_PCR |
| qAT-His-F     | GGTGGCTGTAGTTTAGTGG                              | qRT_PCR |
| qAT-His-R     | TGTGGCTGCTGGGATTCG                               | qRT_PCR |
| qAT-Glu-F     | CCGTTGTAGTCTAGCTGGTC                             | qRT_PCR |
| qAT-Glu-R     | TCCGTTGCCGGGACTCGAAC                             | qRT_PCR |
| qAT-Ile-F     | GGCCTATTAGCTCAGTTGG                              | qRT_PCR |
| qAT-Ile-R     | TGGTGGCCTATACAGGGATC                             | qRT_PCR |
| qAT-Lys-F     | CCGTCTTAGCTCAGTGGTAG                             | qRT_PCR |
| qAT-Lys-R     | TCTGTGGGGATCGAACCCAC                             | qRT_PCR |
| qAT-Met-F     | TCAGAGTGGCGCAGCGGAAG                             | qRT_PCR |
| qAT-Met-R     | GGTATCAGAGCCAGGTTTCG                             | qRT_PCR |
| qAT-Phe-F     | ATAGCTCAGTTGGGAGAGCG                             | qRT_PCR |
| qAT-Phe-R     | GGTGAGCGTGGATCGAACAC                             | qRT_PCR |
| qAT-Pro-F     | GCATTGGTCTAGTGGTATG                              | qRT_PCR |
| qAT-Pro-R     | CATTCCGAGAATCGAACTC                              | qRT_PCR |
| qAT-Ser-F     | ACGTGCCGGAGTGGTTATC                              | qRT_PCR |
| qAT-Ser-R     | TGAACGGCAGGATTCTGAAC                             | qRT_PCR |
| qAT-Thr-F     | CGTATAGCTCAGTGGTAGAG                             | qRT_PCR |
| qAT-Thr-R     | ACACGCAGGATCGAACTAC                              | qRT_PCR |
| qAT-Trp-F     | GATCCGTGGCGCAATGGTAG                             | qRT_PCR |
| qAT-Trp-R     | TGGTGAACCCGACGTGAATC                             | qRT_PCR |
| qAT-Val-F     | GGTTTCGTGGTGTAGTTGG                              | qRT_PCR |
| qAT-Val-R     | GTTCTGAACCGGAGACCTTC                             | qRT_PCR |
| qAT-5s-F      | GGATGCGATCATACCAGC                               | qRT_PCR |
| qAT-5s-R      | GAGGGATGCAACACGAGG                               | qRT_PCR |
| qAT-Gln-F     | GGTTCTATGGTGTAGTGGTTAGC                          | qRT_PCR |
| qAT-Gln-R     | TACCGGGAGTCGAACCCAG                              | qRT_PCR |
| qAT-Gly-F     | GCACCAGTGGTCTAGTGGTA                             | qRT_PCR |
| qAT-Gly-R     | TGCACCAGCCGGAATCGAA                              | qRT_PCR |
| qAT-Leu-F     | TGTCAGAAGTGGGGTTGAACC                            | qRT_PCR |
| qAT-Leu-R     | TCAGGATGGCCGAGTGGTCTAA                           | qRT_PCR |
| qAT-actin     | CTTTATGCCAGTGGTCGTAC                             | qRT_PCR |
| qAT-actin     | CGTAGGATAGCATGTGGAAG                             | qRT_PCR |
| AD.ATRPC1_F   | GTGAATTCCACCCGGGTGGGCATCGATTCAAGAGATGATTGGATCAG  | Y2H     |
| AD.ATRPC2_F   | GTGAATTCCACCCGGGTGGGCATCGATTCAAGCCTCTGTGAGTTTCA  | Y2H     |
| AD.ATRPC3_F   | GTGAATTCCACCCGGGTGGGCATCGATTAAAAAGTCATGAAAAAGCA  | Y2H     |
| AD.ATRPC4_1_F | GTGAATTCCACCCGGGTGGGCATCGATTTCATATATTTTCGATATCTT | Y2H     |
| AD.ATRPC4_2_F | GTGAATTCCACCCGGGTGGGCATCGATTCACTTCTGTGTTCCATGT   | Y2H     |
| AD.ATRPC5_F   | GTGAATTCCACCCGGGTGGGCATCGATTTCATCGAGCTTCTGTAAAA  | Y2H     |
| AD.ATRPC6_F   | GTGAATTCCACCCGGGTGGGCATCGATCTAAAAGTCTAACCATTCTT  | Y2H     |
| AD.ATRPC7_1_F | GTGAATTCCACCCGGGTGGGCATCGATTAAATACACCTCTTCAACTA  | Y2H     |
| AD.ATRPC7_2_F | GTGAATTCCACCCGGGTGGGCATCGATTAAATACACCTCTTCAAATC  | Y2H     |
| AD.ATRPC8_F   | GTGAATTCCACCCGGGTGGGCATCGATTCACTCTTCTTGATCAACCT  | Y2H     |
| AD.ATRPC9_1_F | GTGAATTCCACCCGGGTGGGCATCGATTACGACTGTTCAACCATTCT  | Y2H     |
| AD.ATRPC9_2_F | GTGAATTCCACCCGGGTGGGCATCGATTACGACTGTTCAACCATTCT  | Y2H     |

|                 |                                                  |     |
|-----------------|--------------------------------------------------|-----|
| AD.ATRPC10_1_F  | GTGAATTCCACCCGGGTGGGCATCGATTTCCTCACGCCAAGTGA     | Y2H |
| AD.ATRPC10_2_F  | GTGAATTCCACCCGGGTGGGCATCGATTTCCTCACGCCAAGTGA     | Y2H |
| AD.ATRPAC1_F    | GTGAATTCCACCCGGGTGGGCATCGATTACAGAGAGTTTCAGAGATTA | Y2H |
| AD.ATRPAC2_F    | GTGAATTCCACCCGGGTGGGCATCGATTTCAGTTGTTTCAATGTCCA  | Y2H |
| AD.ATRPABC1_F   | GTGAATTCCACCCGGGTGGGCATCGATTATACAACATAACGATAGG   | Y2H |
| AD.ATRPABC2_1_F | GTGAATTCCACCCGGGTGGGCATCGATTCAATCACCACCAACTTGAC  | Y2H |
| AD.ATRPABC2_2_F | GTGAATTCCACCCGGGTGGGCATCGATTCAATCACCACCGACTTGAC  | Y2H |
| AD.ATRPABC3_1_F | GTGAATTCCACCCGGGTGGGCATCGATTACAGCTTCCTCATGAGTA   | Y2H |
| AD.ATRPABC3_2_F | GTGAATTCCACCCGGGTGGGCATCGATTCAAAGCTTCCTCATGAGTA  | Y2H |
| AD.ATRPABC4_F   | GTGAATTCCACCCGGGTGGGCATCGATTACGCGAGCTTCGTATTGAA  | Y2H |
| AD.ATRPABC5_F   | GTGAATTCCACCCGGGTGGGCATCGATCTAACTGTTGTCTGATTCT   | Y2H |
| AD.ATRPC1_R     | CTCGAGCTCGATGGATCCCGTATCGATATGGAGACGAAGATGGAAAT  | Y2H |
| AD.ATRPC2_R     | CTCGAGCTCGATGGATCCCGTATCGATATGGGACTTGATCAAGAAGA  | Y2H |
| AD.ATRPC3_R     | CTCGAGCTCGATGGATCCCGTATCGATATGTCTATGTCTGAGTTTGG  | Y2H |
| AD.ATRPC4_1_R   | CTCGAGCTCGATGGATCCCGTATCGATATGTATCATACAGTTCCTGC  | Y2H |
| AD.ATRPC4_2_R   | CTCGAGCTCGATGGATCCCGTATCGATATGGATTACAGGCGAACAAAA | Y2H |
| AD.ATRPC5_R     | CTCGAGCTCGATGGATCCCGTATCGATATGGACTTTGATGATGATGA  | Y2H |
| AD.ATRPC6_R     | CTCGAGCTCGATGGATCCCGTATCGATATGAGTAAACGAAAACGTCC  | Y2H |
| AD.ATRPC7_1_R   | CTCGAGCTCGATGGATCCCGTATCGATATGTCTTGAAAGGAGCCCG   | Y2H |
| AD.ATRPC7_2_R   | CTCGAGCTCGATGGATCCCGTATCGATATGTCTTGAAAGGAGGCCG   | Y2H |
| AD.ATRPC8_R     | CTCGAGCTCGATGGATCCCGTATCGATATGTTTTATCTTAGCGAGCT  | Y2H |
| AD.ATRPC9_1_R   | CTCGAGCTCGATGGATCCCGTATCGATATGAAAATAGTCAAGGCAAA  | Y2H |
| AD.ATRPC9_2_R   | CTCGAGCTCGATGGATCCCGTATCGATATGAAGGCAAATGCAGGAGC  | Y2H |
| AD.ATRPC10_1_R  | CTCGAGCTCGATGGATCCCGTATCGATATGGAGTTTGTCCAACATG   | Y2H |
| AD.ATRPC10_2_R  | CTCGAGCTCGATGGATCCCGTATCGATATGGAGTTTGTCCCACATG   | Y2H |
| AD.ATRPAC1_R    | CTCGAGCTCGATGGATCCCGTATCGATATGGGGACTAACGAAGTAAC  | Y2H |
| AD.ATRPAC2_R    | CTCGAGCTCGATGGATCCCGTATCGATATGGAGCACGGTTCGTTCAC  | Y2H |
| AD.ATRPABC1_R   | CTCGAGCTCGATGGATCCCGTATCGATATGTTGACGGAAGAGGAGCT  | Y2H |
| AD.ATRPABC2_1_R | CTCGAGCTCGATGGATCCCGTATCGATATGGCTGACGAAGATTACAA  | Y2H |
| AD.ATRPABC2_2_R | CTCGAGCTCGATGGATCCCGTATCGATATGGCTGACGACGATTACAA  | Y2H |
| AD.ATRPABC3_1_R | CTCGAGCTCGATGGATCCCGTATCGATATGGCGAGCAATATCATCTT  | Y2H |
| AD.ATRPABC3_2_R | CTCGAGCTCGATGGATCCCGTATCGATATGGCGAGCAATATTATCAT  | Y2H |
| AD.ATRPABC4_R   | CTCGAGCTCGATGGATCCCGTATCGATATGGATCCAGCGCCCGAACC  | Y2H |
| AD.ATRPABC5_R   | CTCGAGCTCGATGGATCCCGTATCGATATGATCATCCCTGTTCGTTG  | Y2H |
| BD.ATRPC1_F     | ATGGCCATGGAGGCCGAATTCCCGGGTCAAGAGATGATTGGATCAG   | Y2H |
| BD.ATRPC2_F     | ATGGCCATGGAGGCCGAATTCCCGGGTCAAGCCTCTGTGAGTTTCA   | Y2H |
| BD.ATRPC3_F     | ATGGCCATGGAGGCCGAATTCCCGGGTAAAAGTCATGAAAAAGCA    | Y2H |
| BD.ATRPC4_1_F   | ATGGCCATGGAGGCCGAATTCCCGGGTCATATATTTTCGATATCTT   | Y2H |
| BD.ATRPC4_2_F   | ATGGCCATGGAGGCCGAATTCCCGGGTCACTTCTGTGTTTCCATGT   | Y2H |
| BD.ATRPC5_F     | ATGGCCATGGAGGCCGAATTCCCGGGTCATCGAGCTTTCTGTAAAA   | Y2H |
| BD.ATRPC6_F     | ATGGCCATGGAGGCCGAATTCCCGGGTAAAAGTCTAACCATTCT     | Y2H |
| BD.ATRPC7_1_F   | ATGGCCATGGAGGCCGAATTCCCGGGTAAATACACCTCTCAACTA    | Y2H |
| BD.ATRPC7_2_F   | ATGGCCATGGAGGCCGAATTCCCGGGTAAATACACCTCTCAAATC    | Y2H |
| BD.ATRPC8_F     | ATGGCCATGGAGGCCGAATTCCCGGGTCACTTCTTGTATCAACCT    | Y2H |
| BD.ATRPC9_1_F   | ATGGCCATGGAGGCCGAATTCCCGGGTCACGACTGTTCAACATTCT   | Y2H |

|                 |                                                 |               |
|-----------------|-------------------------------------------------|---------------|
| BD.ATRPC9_2_F   | ATGGCCATGGAGGCCGAATTCCCGGGTCACGACTGTTCACCATTTCT | Y2H           |
| BD.ATRPC10_1_F  | ATGGCCATGGAGGCCGAATTCCCGGGTCATTCTCACGCCAAGTGA   | Y2H           |
| BD.ATRPC10_2_F  | ATGGCCATGGAGGCCGAATTCCCGGGTCATTCTCACGCCAAGTGA   | Y2H           |
| BD.ATRPC1_F     | ATGGCCATGGAGGCCGAATTCCCGGGTCAGGAGAGTTCAGAGATTA  | Y2H           |
| BD.ATRPC2_F     | ATGGCCATGGAGGCCGAATTCCCGGGTCAGTTGTTTTCAATGTCCA  | Y2H           |
| BD.ATRPABC1_F   | ATGGCCATGGAGGCCGAATTCCCGGGTTATACAACATAACGATAGG  | Y2H           |
| BD.ATRPABC2_1_F | ATGGCCATGGAGGCCGAATTCCCGGGTCAATCACCACCAACTTGAC  | Y2H           |
| BD.ATRPABC2_2_F | ATGGCCATGGAGGCCGAATTCCCGGGTCAATCACCACCGACTTGAC  | Y2H           |
| BD.ATRPABC3_1_F | ATGGCCATGGAGGCCGAATTCCCGGGTCACAGCTTCTCATGAGTA   | Y2H           |
| BD.ATRPABC3_2_F | ATGGCCATGGAGGCCGAATTCCCGGGTCAAAGCTTCTCATGAGTA   | Y2H           |
| BD.ATRPABC4_F   | ATGGCCATGGAGGCCGAATTCCCGGGTCAGCGAGCTTCGTATTGAA  | Y2H           |
| BD.ATRPABC5_F   | ATGGCCATGGAGGCCGAATTCCCGGGCTAACTGTTGTCTGATTTCT  | Y2H           |
| BD.ATRPC1_R     | CCGCTGCAGGTCGACGGATCCCCGGGATGGAGACGAAGATGGAAAT  | Y2H           |
| BD.ATRPC2_R     | CCGCTGCAGGTCGACGGATCCCCGGGATGGGACTTGATCAAGAAGA  | Y2H           |
| BD.ATRPC3_R     | CCGCTGCAGGTCGACGGATCCCCGGGATGTCTATGTCTGAGTTTGG  | Y2H           |
| BD.ATRPC4_1_R   | CCGCTGCAGGTCGACGGATCCCCGGGATGTATCATACAGTTCCTGC  | Y2H           |
| BD.ATRPC4_2_R   | CCGCTGCAGGTCGACGGATCCCCGGGATGGATTAGGCGAACAAAA   | Y2H           |
| BD.ATRPC5_R     | CCGCTGCAGGTCGACGGATCCCCGGGATGGACTTTGATGATGATGA  | Y2H           |
| BD.ATRPC6_R     | CCGCTGCAGGTCGACGGATCCCCGGGATGAGTAAACGAAAACGTCC  | Y2H           |
| BD.ATRPC7_1_R   | CCGCTGCAGGTCGACGGATCCCCGGGATGTCTTGAAAGGAGCCCG   | Y2H           |
| BD.ATRPC7_2_R   | CCGCTGCAGGTCGACGGATCCCCGGGATGTCTTGAAAGGAGGCCCG  | Y2H           |
| BD.ATRPC8_R     | CCGCTGCAGGTCGACGGATCCCCGGGATGTTTATCTTAGCGAGCT   | Y2H           |
| BD.ATRPC9_1_R   | CCGCTGCAGGTCGACGGATCCCCGGGATGAAAAATAGTCAAGGCAAA | Y2H           |
| BD.ATRPC9_2_R   | CCGCTGCAGGTCGACGGATCCCCGGGATGAAGGCAATGCAGGAGC   | Y2H           |
| BD.ATRPC10_1_R  | CCGCTGCAGGTCGACGGATCCCCGGGATGGAGTTTTGTCCAACATG  | Y2H           |
| BD.ATRPC10_2_R  | CCGCTGCAGGTCGACGGATCCCCGGGATGGAGTTTTGTCCACATG   | Y2H           |
| BD.ATRPC1_R     | CCGCTGCAGGTCGACGGATCCCCGGGATGGGGACTAACGAAGTAAC  | Y2H           |
| BD.ATRPC2_R     | CCGCTGCAGGTCGACGGATCCCCGGGATGGAGCACGGTTCGTTAC   | Y2H           |
| BD.ATRPABC1_R   | CCGCTGCAGGTCGACGGATCCCCGGGATGTTGACGGAAGAGGAGCT  | Y2H           |
| BD.ATRPABC2_1_R | CCGCTGCAGGTCGACGGATCCCCGGGATGGCTGACGAAGATTACAA  | Y2H           |
| BD.ATRPABC2_2_R | CCGCTGCAGGTCGACGGATCCCCGGGATGGCTGACGACGATTACAA  | Y2H           |
| BD.ATRPABC3_1_R | CCGCTGCAGGTCGACGGATCCCCGGGATGGCGAGCAATATCATCTT  | Y2H           |
| BD.ATRPABC3_2_R | CCGCTGCAGGTCGACGGATCCCCGGGATGGCGAGCAATATTATCAT  | Y2H           |
| BD.ATRPABC4_R   | CCGCTGCAGGTCGACGGATCCCCGGGATGGATCCAGCGCCCGAACC  | Y2H           |
| BD.ATRPABC5_R   | CCGCTGCAGGTCGACGGATCCCCGGGATGATCATCCCTGTTCGTTG  | Y2H           |
| ATRPC1_F        | CAGGTCGACTCTAGAGGATCCCCGGGTCAAGAGATGATTGGATCAG  | antisense RNA |
| ATRPC2_F        | CAGGTCGACTCTAGAGGATCCCCGGGTCAAGCCTCTGTGAGTTTCA  | antisense RNA |
| ATRPC3_F        | CAGGTCGACTCTAGAGGATCCCCGGGTAAAAAGTCATGAAAAAGCA  | antisense RNA |
| ATRPC4_1_F      | CAGGTCGACTCTAGAGGATCCCCGGGTCATATATTTTCGATATCTT  | antisense RNA |
| ATRPC4_2_F      | CAGGTCGACTCTAGAGGATCCCCGGGTCACTTCTGTGTTTCCATGT  | antisense RNA |
| ATRPC5_F        | CAGGTCGACTCTAGAGGATCCCCGGGTATCGAGCTTTCTGTAAAAA  | antisense RNA |
| ATRPC6_F        | CAGGTCGACTCTAGAGGATCCCCGGGTAAAAAGTCTAACCATTCT   | antisense RNA |
| ATRPC7_1_F      | CAGGTCGACTCTAGAGGATCCCCGGGTAAATACACCTCTTCAACTA  | antisense RNA |
| ATRPC7_2_F      | CAGGTCGACTCTAGAGGATCCCCGGGTAAATACACCTCTTCAAATC  | antisense RNA |
| ATRPC8_F        | CAGGTCGACTCTAGAGGATCCCCGGGTCACTCTTCTTGATCAACCT  | antisense RNA |

|              |                                                 |               |
|--------------|-------------------------------------------------|---------------|
| ATRPC9_1_F   | CAGGTCGACTCTAGAGGATCCCCGGGTCACGACTGTTACCATTCT   | antisense RNA |
| ATRPC9_2_F   | CAGGTCGACTCTAGAGGATCCCCGGGTCACGACTGTTACCATTCT   | antisense RNA |
| ATRPC10_1_F  | CAGGTCGACTCTAGAGGATCCCCGGGTCATTCTCACGCCAAGTGA   | antisense RNA |
| ATRPC10_2_F  | CAGGTCGACTCTAGAGGATCCCCGGGTCATTCTCACGCCAAGTGA   | antisense RNA |
| ATRPAC1_F    | CAGGTCGACTCTAGAGGATCCCCGGGTCAGGAGAGTTCAGAGATTA  | antisense RNA |
| ATRPAC2_F    | CAGGTCGACTCTAGAGGATCCCCGGGTCAGTTGTTTCAATGTCCA   | antisense RNA |
| ATRPABC1_F   | CAGGTCGACTCTAGAGGATCCCCGGGTTATACAACATAACGATAGG  | antisense RNA |
| ATRPABC2_1_F | CAGGTCGACTCTAGAGGATCCCCGGGTCATCACCACCAACTTGAC   | antisense RNA |
| ATRPABC2_2_F | CAGGTCGACTCTAGAGGATCCCCGGGTCATCACCACCGACTTGAC   | antisense RNA |
| ATRPABC3_1_F | CAGGTCGACTCTAGAGGATCCCCGGGTCACAGCTTCCTCATGAGTA  | antisense RNA |
| ATRPABC3_2_F | CAGGTCGACTCTAGAGGATCCCCGGGTCAAAGCTTCCTCATGAGTA  | antisense RNA |
| ATRPABC4_F   | CAGGTCGACTCTAGAGGATCCCCGGGTCAGCGAGCTTCGTATTGAA  | antisense RNA |
| ATRPABC5_F   | CAGGTCGACTCTAGAGGATCCCCGGGCTAACTGTTGTCTGATTCT   | antisense RNA |
| ATRPC1_R     | GGGGAAATTCGAGCTCGGTACCCGGGATGGAGACGAAGATGGAAAT  | antisense RNA |
| ATRPC2_R     | GGGGAAATTCGAGCTCGGTACCCGGGATGGGACTTGATCAAGAAGA  | antisense RNA |
| ATRPC3_R     | GGGGAAATTCGAGCTCGGTACCCGGGATGTCTATGTCTGAGTTTGG  | antisense RNA |
| ATRPC4_1_R   | GGGGAAATTCGAGCTCGGTACCCGGGATGTATCATACAGTTCCTGC  | antisense RNA |
| ATRPC4_2_R   | GGGGAAATTCGAGCTCGGTACCCGGGATGGATTAGGCGAACAAAA   | antisense RNA |
| ATRPC5_R     | GGGGAAATTCGAGCTCGGTACCCGGGATGGACTTTGATGATGATGA  | antisense RNA |
| ATRPC6_R     | GGGGAAATTCGAGCTCGGTACCCGGGATGAGTAAACGAAAACGTCC  | antisense RNA |
| ATRPC7_1_R   | GGGGAAATTCGAGCTCGGTACCCGGGATGTCTTGGAAGGAGCCCG   | antisense RNA |
| ATRPC7_2_R   | GGGGAAATTCGAGCTCGGTACCCGGGATGTCTTGGAAGGAGGCCCG  | antisense RNA |
| ATRPC8_R     | GGGGAAATTCGAGCTCGGTACCCGGGATGTTTATCTTAGCGAGCT   | antisense RNA |
| ATRPC9_1_R   | GGGGAAATTCGAGCTCGGTACCCGGGATGAAAATAGTCAAGGCAAA  | antisense RNA |
| ATRPC9_2_R   | GGGGAAATTCGAGCTCGGTACCCGGGATGAAGGCAAAATGCAGGAGC | antisense RNA |
| ATRPC10_1_R  | GGGGAAATTCGAGCTCGGTACCCGGGATGGAGTTTGTCCAACATG   | antisense RNA |
| ATRPC10_2_R  | GGGGAAATTCGAGCTCGGTACCCGGGATGGAGTTTGTCCCACATG   | antisense RNA |
| ATRPAC1_R    | GGGGAAATTCGAGCTCGGTACCCGGGATGGGGACTAACGAAGTAAC  | antisense RNA |
| ATRPAC2_R    | GGGGAAATTCGAGCTCGGTACCCGGGATGGAGCACGGTTCGTTAC   | antisense RNA |
| ATRPABC1_R   | GGGGAAATTCGAGCTCGGTACCCGGGATGTTGACGGAAGAGGAGCT  | antisense RNA |
| ATRPABC2_1_R | GGGGAAATTCGAGCTCGGTACCCGGGATGGCTGACGAAGATTACAA  | antisense RNA |
| ATRPABC2_2_R | GGGGAAATTCGAGCTCGGTACCCGGGATGGCTGACGACGATTACAA  | antisense RNA |
| ATRPABC3_1_R | GGGGAAATTCGAGCTCGGTACCCGGGATGGCGAGCAATATCATCTT  | antisense RNA |
| ATRPABC3_2_R | GGGGAAATTCGAGCTCGGTACCCGGGATGGCGAGCAATATTATCAT  | antisense RNA |
| ATRPABC4_R   | GGGGAAATTCGAGCTCGGTACCCGGGATGGATCCAGCGCCCGAACC  | antisense RNA |
| ATRPABC5_R   | GGGGAAATTCGAGCTCGGTACCCGGGATGATCATCCCTGTTCGTTG  | antisense RNA |

**Supplemental Table2.** Raw data quality control for RNA-seq.

| Sample |    | Library Type | Reads Len.(bp) | Clean Reads | Clean Data(bp) | Q20(%) | Q30(%) | GC(%) |
|--------|----|--------------|----------------|-------------|----------------|--------|--------|-------|
| WT-1   | R1 | Paired-End   | 150            | 19,834,816  | 2,975,222,400  | 99.97% | 98.48% | 46    |
| WT-1   | R2 | Paired-End   | 150            | 19,834,816  | 2,975,222,400  | 99.97% | 98.51% | 46    |

|                 |    |            |     |            |               |         |        |    |
|-----------------|----|------------|-----|------------|---------------|---------|--------|----|
| WT-2            | R1 | Paired-End | 150 | 23,838,015 | 3,575,702,250 | 99.97%  | 98.22% | 46 |
| WT-2            | R2 | Paired-End | 150 | 23,838,015 | 3,575,702,250 | 99.97%  | 98.06% | 46 |
| WT-3            | R1 | Paired-End | 150 | 22,503,155 | 3,375,473,250 | 99.97%  | 98.31% | 46 |
| WT-3            | R2 | Paired-End | 150 | 22,503,155 | 3,375,473,250 | 99.97%  | 98.39% | 46 |
| <i>rpc2-1</i>   | R1 | Paired-End | 150 | 26,274,208 | 3,941,131,200 | 99.98%  | 98.54% | 46 |
| <i>rpc2-1</i>   | R2 | Paired-End | 150 | 26,274,208 | 3,941,131,200 | 99.97%  | 98.28% | 46 |
| <i>rpc2-2</i>   | R1 | Paired-End | 150 | 24,974,293 | 3,746,143,950 | 99.98%  | 98.48% | 45 |
| <i>rpc2-2</i>   | R2 | Paired-End | 150 | 24,974,293 | 3,746,143,950 | 99.98%  | 98.16% | 45 |
| <i>rpc2-3</i>   | R1 | Paired-End | 150 | 22,931,583 | 3,439,737,450 | 99.98%  | 98.59% | 46 |
| <i>rpc2-3</i>   | R2 | Paired-End | 150 | 22,931,583 | 3,439,737,450 | 99.98%  | 98.50% | 46 |
| <i>rpc3-1</i>   | R1 | Paired-End | 150 | 23,780,998 | 3,567,149,700 | 99.97%  | 98.40% | 45 |
| <i>rpc3-1</i>   | R2 | Paired-End | 150 | 23,780,998 | 3,567,149,700 | 99.97%  | 98.55% | 45 |
| <i>rpc3-2</i>   | R1 | Paired-End | 150 | 23,901,665 | 3,585,249,750 | 99.97%  | 97.81% | 45 |
| <i>rpc3-2</i>   | R2 | Paired-End | 150 | 23,901,665 | 3,585,249,750 | 99.97%  | 98.19% | 45 |
| <i>rpc3-3</i>   | R1 | Paired-End | 150 | 21,072,480 | 3,160,872,000 | 99.97%  | 98.52% | 45 |
| <i>rpc3-3</i>   | R2 | Paired-End | 150 | 21,072,480 | 3,160,872,000 | 99.97%  | 98.46% | 45 |
| <i>rpc8-1</i>   | R1 | Paired-End | 150 | 23,827,080 | 3,574,062,000 | 99.98%  | 98.37% | 45 |
| <i>rpc8-1</i>   | R2 | Paired-End | 150 | 23,827,080 | 3,574,062,000 | 99.98%  | 98.32% | 45 |
| <i>rpc8-2</i>   | R1 | Paired-End | 150 | 23,257,743 | 3,488,661,450 | 99.99%  | 98.52% | 45 |
| <i>rpc8-2</i>   | R2 | Paired-End | 150 | 23,257,743 | 3,488,661,450 | 99.99%  | 98.28% | 45 |
| <i>rpc8-3</i>   | R1 | Paired-End | 150 | 19,549,636 | 2,932,445,400 | 100.00% | 98.62% | 45 |
| <i>rpc8-3</i>   | R2 | Paired-End | 150 | 19,549,636 | 2,932,445,400 | 99.99%  | 98.72% | 45 |
| <i>rpabc1-1</i> | R1 | Paired-End | 150 | 25,738,293 | 3,860,743,950 | 99.98%  | 98.59% | 46 |
| <i>rpabc1-1</i> | R2 | Paired-End | 150 | 25,738,293 | 3,860,743,950 | 99.98%  | 98.76% | 46 |
| <i>rpabc1-2</i> | R1 | Paired-End | 150 | 24,249,992 | 3,637,498,800 | 99.98%  | 98.31% | 46 |
| <i>rpabc1-2</i> | R2 | Paired-End | 150 | 24,249,992 | 3,637,498,800 | 99.97%  | 98.26% | 46 |
| <i>rpabc1-3</i> | R1 | Paired-End | 150 | 22,128,255 | 3,319,238,250 | 99.98%  | 98.36% | 46 |
| <i>rpabc1-3</i> | R2 | Paired-End | 150 | 22,128,255 | 3,319,238,250 | 99.97%  | 98.11% | 46 |
| <i>rpabc2-1</i> | R1 | Paired-End | 150 | 22,768,031 | 3,415,204,650 | 99.98%  | 98.30% | 46 |
| <i>rpabc2-1</i> | R2 | Paired-End | 150 | 22,768,031 | 3,415,204,650 | 99.98%  | 98.25% | 46 |
| <i>rpabc2-2</i> | R1 | Paired-End | 150 | 21,484,660 | 3,222,699,000 | 99.99%  | 98.64% | 45 |
| <i>rpabc2-2</i> | R2 | Paired-End | 150 | 21,484,660 | 3,222,699,000 | 99.99%  | 98.79% | 45 |
| <i>rpabc2-3</i> | R1 | Paired-End | 150 | 23,153,055 | 3,472,958,250 | 99.99%  | 98.61% | 46 |
| <i>rpabc2-3</i> | R2 | Paired-End | 150 | 23,153,055 | 3,472,958,250 | 99.99%  | 98.52% | 46 |

**Supplemental Table3.** Mapped data quality summary for RNA-seq.

|  | Total<br>(Tags) | CDS_<br>Exons | % | Introns<br>(Tags) | % | 5'UTR_<br>Exons | % | 3'UTR_<br>Exons | % |
|--|-----------------|---------------|---|-------------------|---|-----------------|---|-----------------|---|
|--|-----------------|---------------|---|-------------------|---|-----------------|---|-----------------|---|

|                  |            | (Tags)     |       |         |      | (Tags)  |      | (Tags)    |       |
|------------------|------------|------------|-------|---------|------|---------|------|-----------|-------|
| WT-1             | 31,874,446 | 28,809,857 | 90.39 | 135,284 | 0.42 | 541,293 | 1.84 | 2,388,012 | 7.52  |
| WT-2             | 41,964,479 | 38,236,859 | 91.12 | 261,270 | 0.62 | 882,268 | 2.24 | 2,584,082 | 6.20  |
| WT-3             | 40,841,539 | 37,017,709 | 90.64 | 193,875 | 0.47 | 763,981 | 2.01 | 2,865,974 | 7.05  |
| <i>nrpc2-1</i>   | 36,849,447 | 33,015,423 | 89.60 | 193,397 | 0.52 | 596,063 | 1.76 | 3,044,564 | 8.31  |
| <i>nrpc2-2</i>   | 40,858,988 | 36,630,778 | 89.65 | 210,565 | 0.52 | 720,658 | 1.92 | 3,296,987 | 8.11  |
| <i>nrpc2-3</i>   | 35,523,106 | 31,869,290 | 89.71 | 150,784 | 0.42 | 617,872 | 1.89 | 2,885,160 | 8.16  |
| <i>nrpc3-1</i>   | 39,117,524 | 34,742,571 | 88.82 | 186,386 | 0.48 | 686,395 | 1.93 | 3,502,172 | 9.00  |
| <i>nrpc3-2</i>   | 37,344,773 | 32,971,239 | 88.29 | 177,584 | 0.48 | 549,403 | 1.63 | 3,646,547 | 9.81  |
| <i>nrpc3-3</i>   | 36,288,917 | 31,994,235 | 88.17 | 158,098 | 0.44 | 547,144 | 1.67 | 3,589,440 | 9.93  |
| <i>nrpc8-1</i>   | 35,806,247 | 31,329,240 | 87.50 | 286,294 | 0.80 | 480,258 | 1.50 | 3,710,455 | 10.45 |
| <i>nrpc8-2</i>   | 38,047,933 | 34,201,304 | 89.89 | 213,788 | 0.56 | 667,850 | 1.90 | 2,964,991 | 7.84  |
| <i>nrpc8-3</i>   | 34,761,280 | 31,445,533 | 90.46 | 233,624 | 0.67 | 753,749 | 2.32 | 2,328,374 | 6.74  |
| <i>nrpabc1-1</i> | 37,142,842 | 33,208,365 | 89.41 | 192,119 | 0.52 | 620,315 | 1.82 | 3,122,043 | 8.45  |
| <i>nrpabc1-2</i> | 33,934,192 | 30,331,896 | 89.38 | 177,270 | 0.52 | 549,344 | 1.77 | 2,875,682 | 8.52  |
| <i>nrpabc1-3</i> | 31,427,842 | 28,156,065 | 89.59 | 179,752 | 0.57 | 510,882 | 1.77 | 2,581,143 | 8.26  |
| <i>nrpabc2-1</i> | 37,194,447 | 33,383,197 | 89.75 | 183,714 | 0.49 | 659,953 | 1.93 | 2,967,583 | 8.02  |
| <i>nrpabc2-2</i> | 38,423,503 | 34,619,680 | 90.10 | 195,378 | 0.51 | 760,252 | 2.14 | 2,848,193 | 7.45  |
| <i>nrpabc2-3</i> | 38,888,184 | 35,102,282 | 90.26 | 191,185 | 0.49 | 811,718 | 2.25 | 2,782,999 | 7.19  |
